# Supplementary material
Source: Royal Society of Chemistry journal article supplement (doi:10.1039/d6py00513f)
Supplement: d6py00513f1.pdf [file d6py00513f1.pdf]

## Supporting Information

### Redox-Regulated Fusion and Fission of Se/Te-Containing Polymer Assemblies for Compartmentalized Reactions

*Zhuoxin Ge<sup>a</sup>, Muqing Cao<sup>a, \*</sup>, Huaping Xu<sup>a, \*</sup>*

<sup>a</sup>Key Lab of Organic Optoelectronics & Molecular Engineering, Department of  
Chemistry, Tsinghua University, Beijing, 100084, China

\*Corresponding author. *Huaping Xu E-mail: [xuhuaping@mail.tsinghua.edu.cn](mailto:xuhuaping@mail.tsinghua.edu.cn)*

*Muqing Cao E-mail: [caomq@mail.tsinghua.edu.cn](mailto:caomq@mail.tsinghua.edu.cn)*

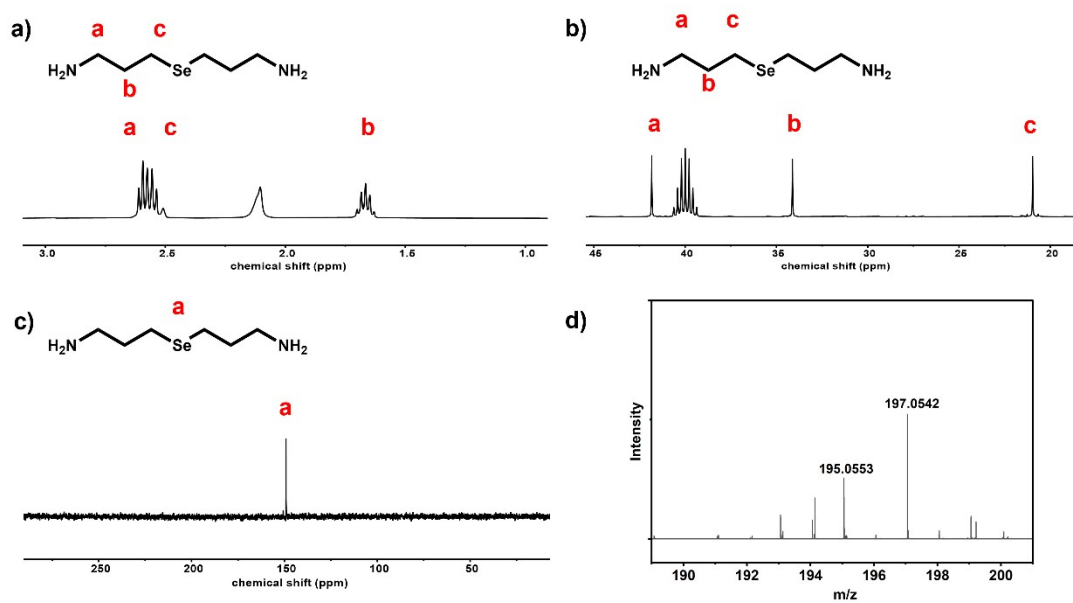

**Fig. S1.** Characterization of  $\text{H}_2\text{N}-(\text{CH}_2)_3\text{-Se}-(\text{CH}_2)_3\text{-NH}_2$ : (a)  $^1\text{H}$  NMR spectrum; (b)  $^{13}\text{C}$  NMR spectrum; (c)  $^{77}\text{Se}$  NMR spectrum and (d) mass spectrum.

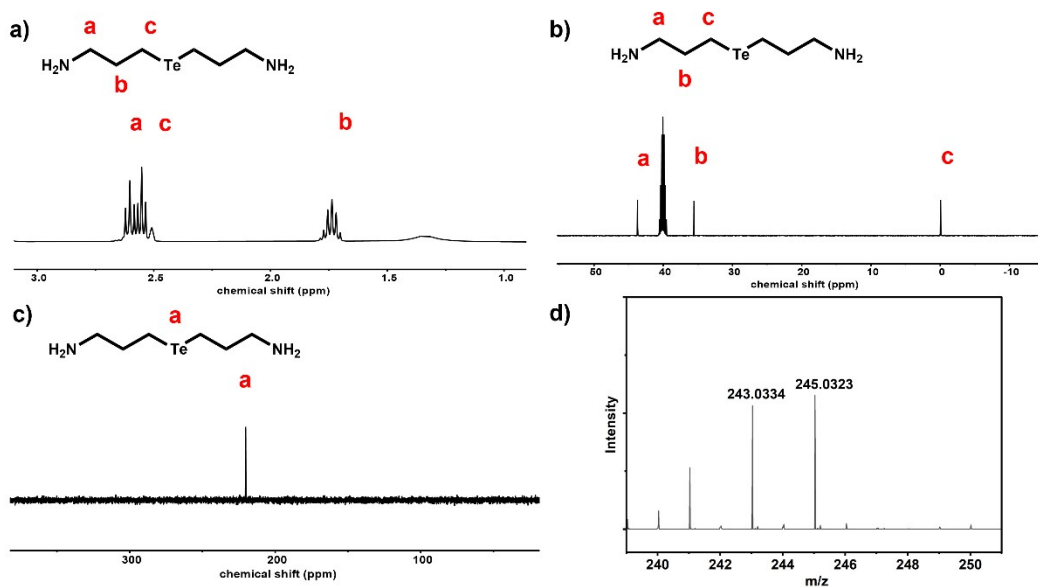

**Fig. S2.** Characterization of  $\text{H}_2\text{N}-(\text{CH}_2)_3\text{-Te}-(\text{CH}_2)_3\text{-NH}_2$ : (a)  $^1\text{H}$  NMR spectrum; (b)  $^{13}\text{C}$  NMR spectrum; (c)  $^{125}\text{Te}$  NMR spectrum and (d) mass spectrum.

| Sample          | mPEG<br>(g) | SeC <sub>3</sub> NH <sub>2</sub><br>(mg) | TeC <sub>3</sub> NH <sub>2</sub><br>(mg) | TDI<br>(mg) | Cat.<br>( $\mu$ l) | DMF<br>(ml) |
|-----------------|-------------|------------------------------------------|------------------------------------------|-------------|--------------------|-------------|
| Te100PEG5000    | 0.500       | 0                                        | 244                                      | 183         | 20                 | 10          |
| Se25Te75PEG5000 | 0.500       | 49                                       | 183                                      | 183         | 20                 | 10          |
| Se50Te50PEG5000 | 0.500       | 98                                       | 122                                      | 183         | 20                 | 10          |
| Se75Te25PEG5000 | 0.500       | 146                                      | 61                                       | 183         | 20                 | 10          |
| Se100PEG5000    | 0.500       | 195                                      | 0                                        | 183         | 20                 | 10          |
| Te100PEG2000    | 0.200       | 0                                        | 244                                      | 183         | 20                 | 10          |
| Se25Te75PEG2000 | 0.200       | 49                                       | 183                                      | 183         | 20                 | 10          |
| Se50Te50PEG2000 | 0.200       | 98                                       | 122                                      | 183         | 20                 | 10          |
| Se75Te25PEG2000 | 0.200       | 146                                      | 61                                       | 183         | 20                 | 10          |
| Se100PEG2000    | 0.200       | 195                                      | 0                                        | 183         | 20                 | 10          |
| Te100PEG750     | 0.075       | 0                                        | 244                                      | 183         | 20                 | 10          |
| Se25Te75PEG750  | 0.075       | 49                                       | 183                                      | 183         | 20                 | 10          |
| Se50Te50PEG750  | 0.075       | 98                                       | 122                                      | 183         | 20                 | 10          |
| Se75Te25PEG750  | 0.075       | 146                                      | 61                                       | 183         | 20                 | 10          |
| Se100PEG750     | 0.075       | 195                                      | 0                                        | 183         | 20                 | 10          |

**Table S1.** Formulation of each sample, showing the variation in ratios of mPEG, SeC<sub>3</sub>NH<sub>2</sub>, TeC<sub>3</sub>NH<sub>2</sub>, TDI, catalyst, and DMF for block copolymers with different Se/Te ratios.

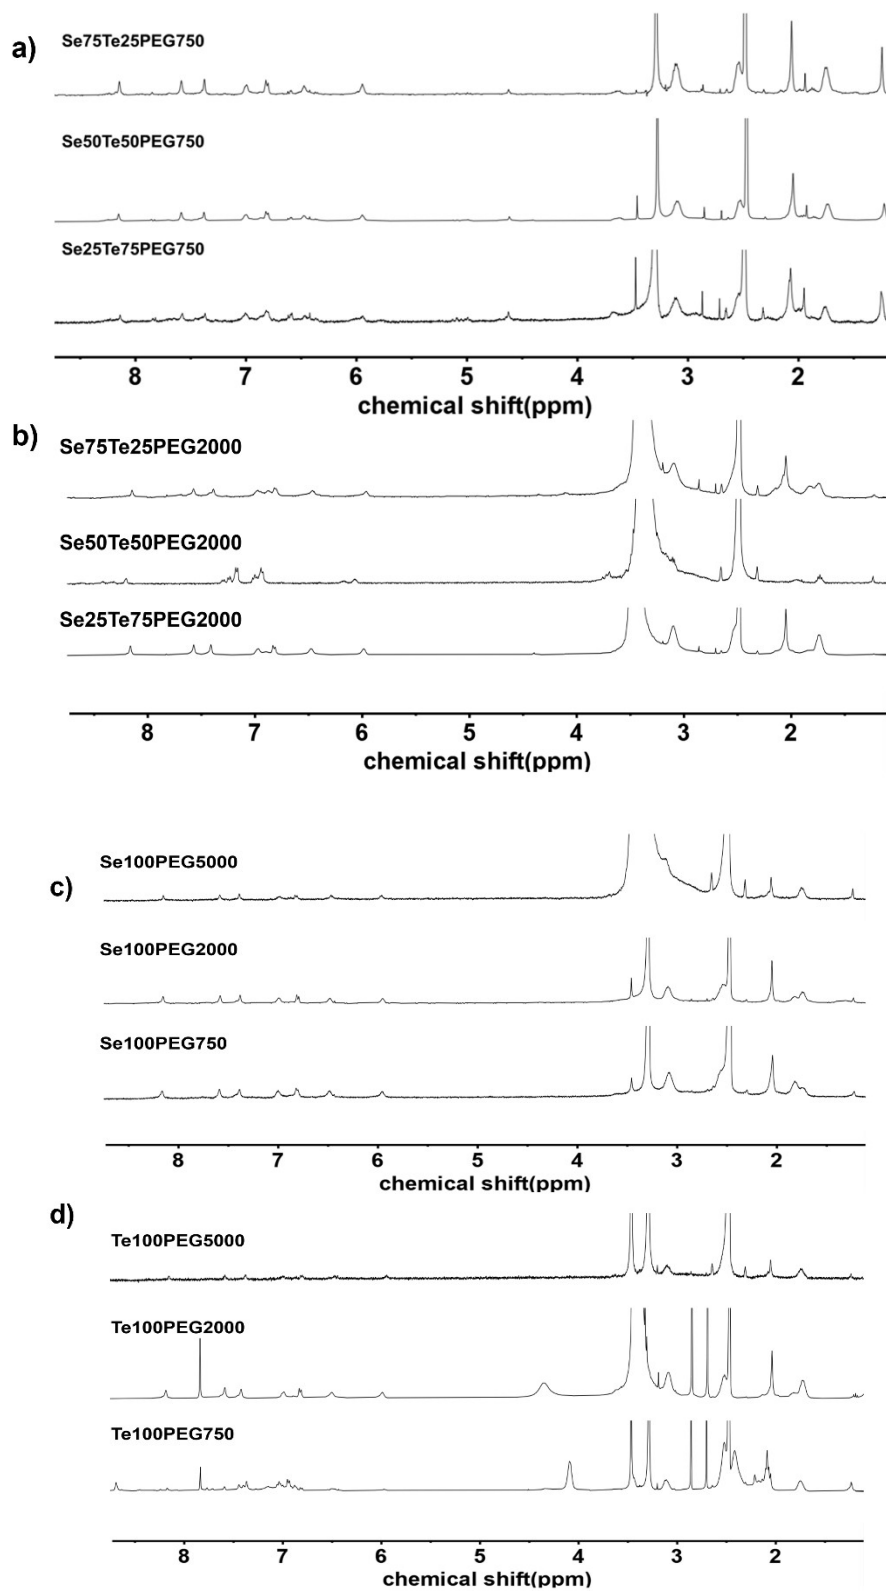

**Fig. S3.**  $^1\text{H}$  NMR spectrum of block polymers.

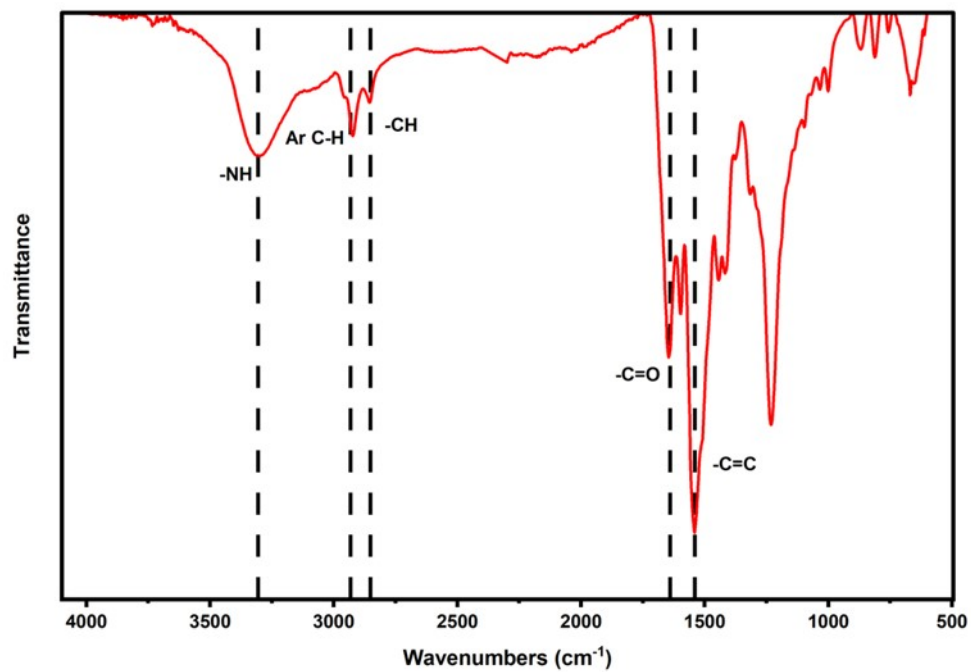

Fig. S4. FT-IR spectra of Se<sub>25</sub>Te<sub>75</sub>PEG5000

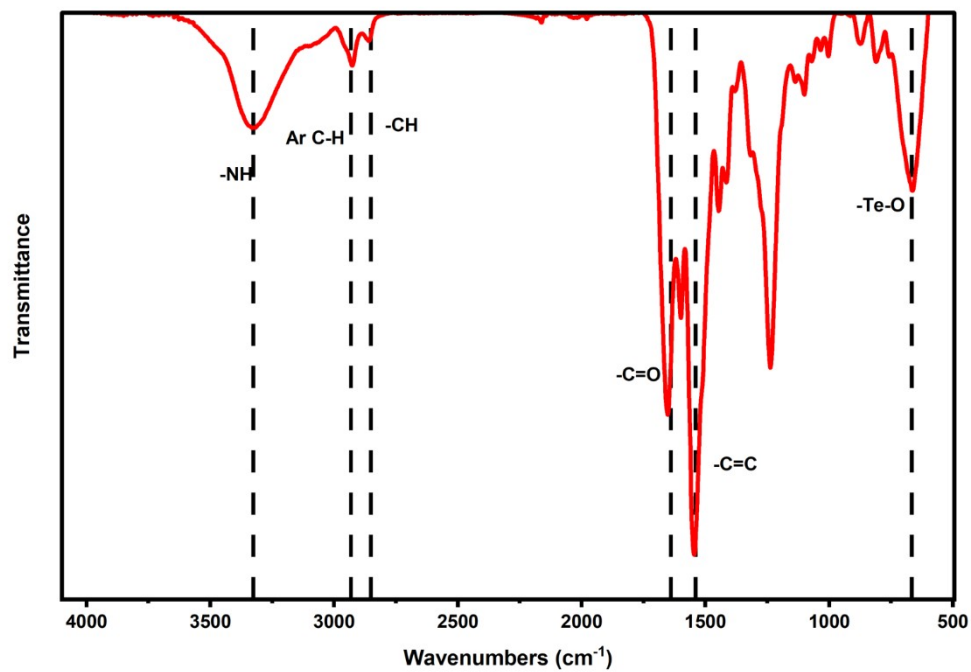

Fig. S5. FT-IR spectrum of oxidized Se<sub>25</sub>Te<sub>75</sub>PEG5000

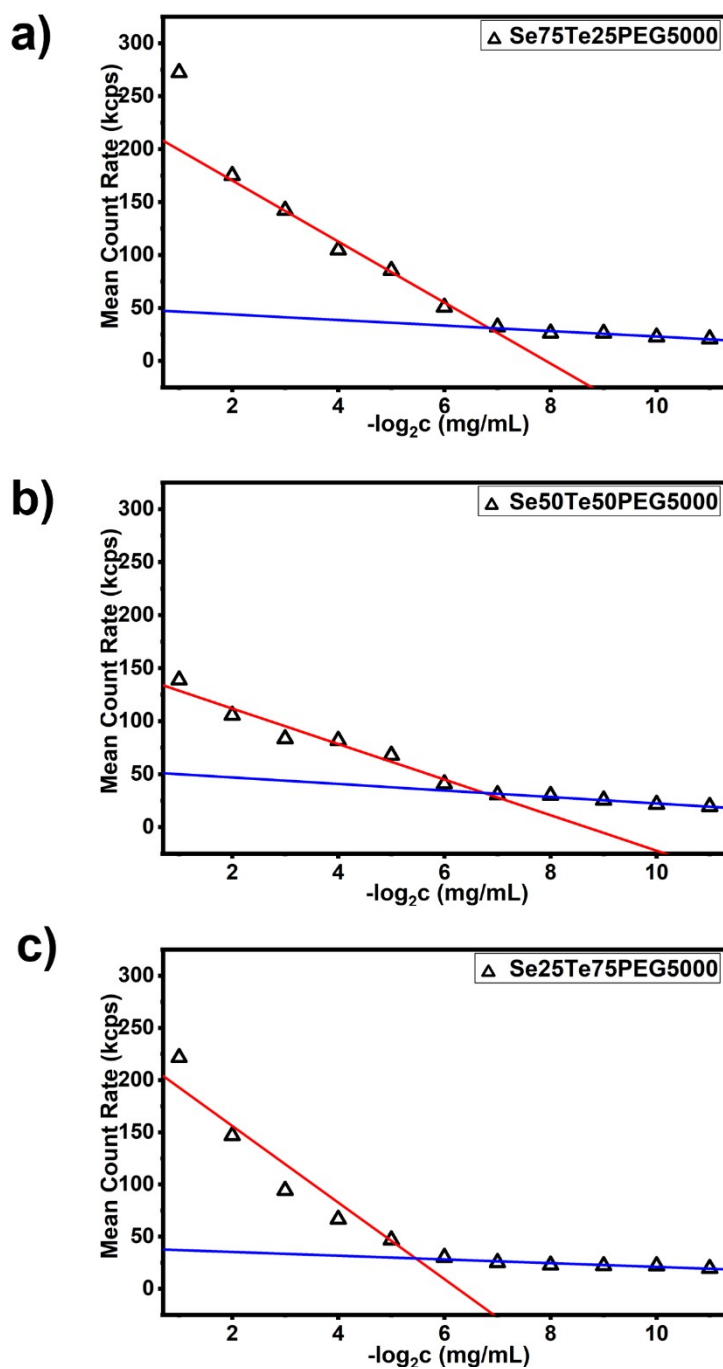

**Fig. S6.** a-c) Critical micelle concentration (CMC) of the assembly of three block copolymers (Se25Te75PEG5000, Se50Te50PEG5000 and Se75Te25PEG5000) measured by dynamic light scattering (DLS)

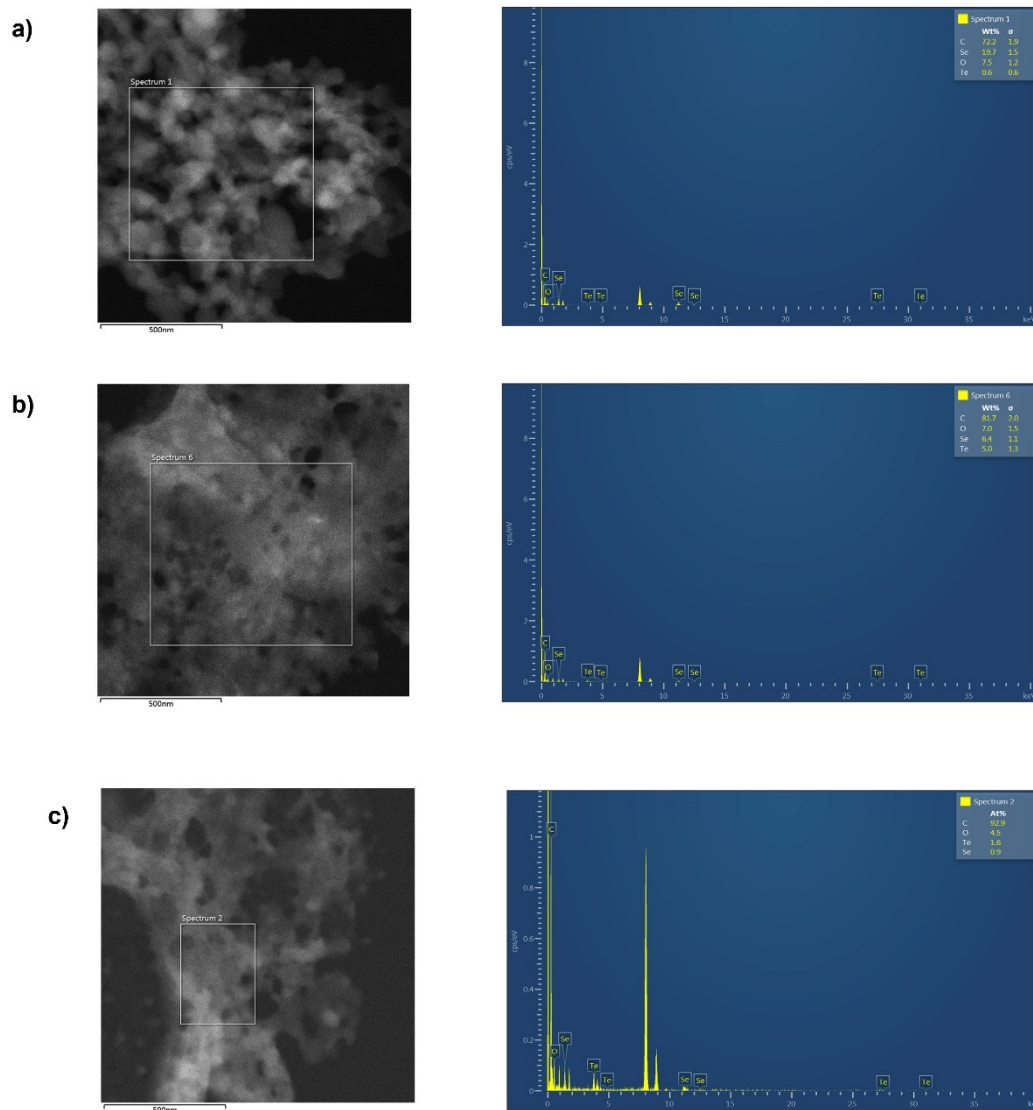

**Fig. S7.** EDS characterization of the assemblies. a) Se<sub>75</sub>Te<sub>25</sub>PEG5000 Se=80.2% Te=19.8%.  
 b) Se<sub>50</sub>Te<sub>50</sub>PEG5000 Se=57.7% Te=42.3%. c) Se<sub>25</sub>Te<sub>75</sub>PEG5000 Se=36.0% Te=64.0%.

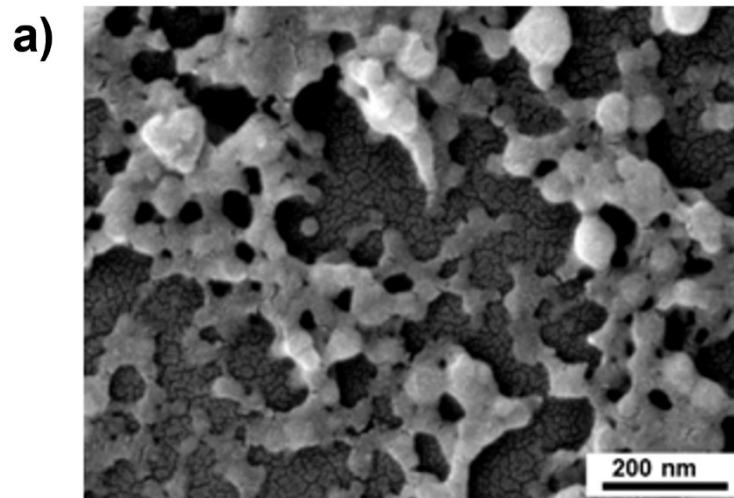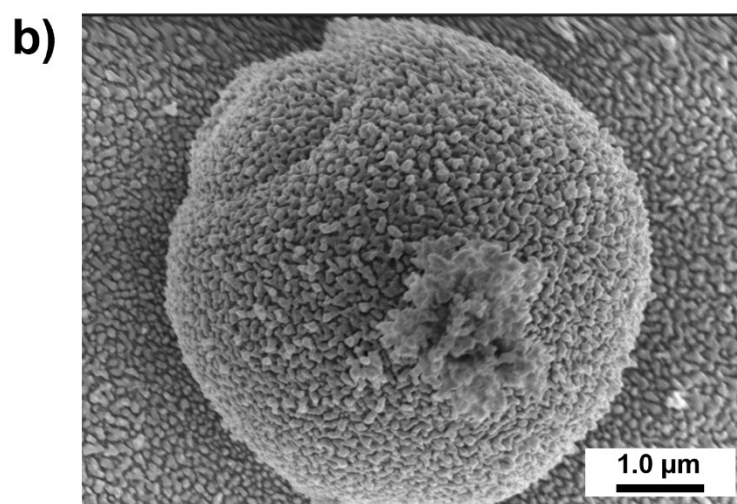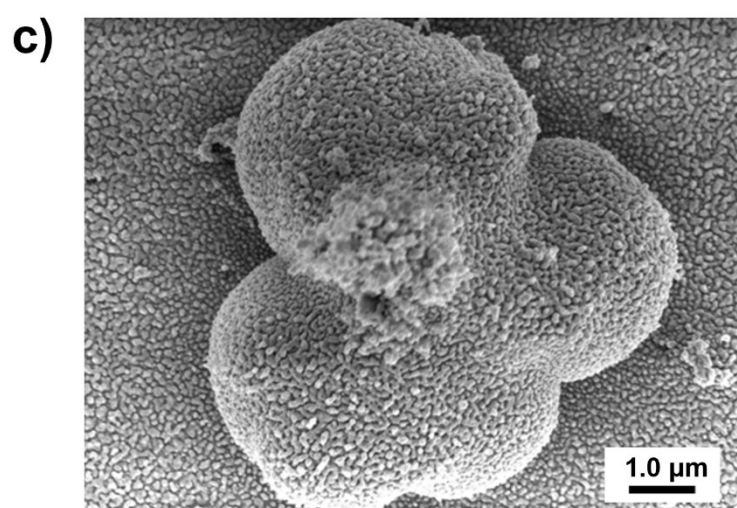

**Fig. S8.** SEM image of Se<sub>25</sub>Te<sub>75</sub>PEG5000 assembly in oxidation stage. a) Se<sub>25</sub>Te<sub>75</sub>PEG5000 in C oxidation stage. b) Se<sub>25</sub>Te<sub>75</sub>PEG5000 in E oxidation stage. c) Se<sub>25</sub>Te<sub>75</sub>PEG5000 in F oxidation stage.

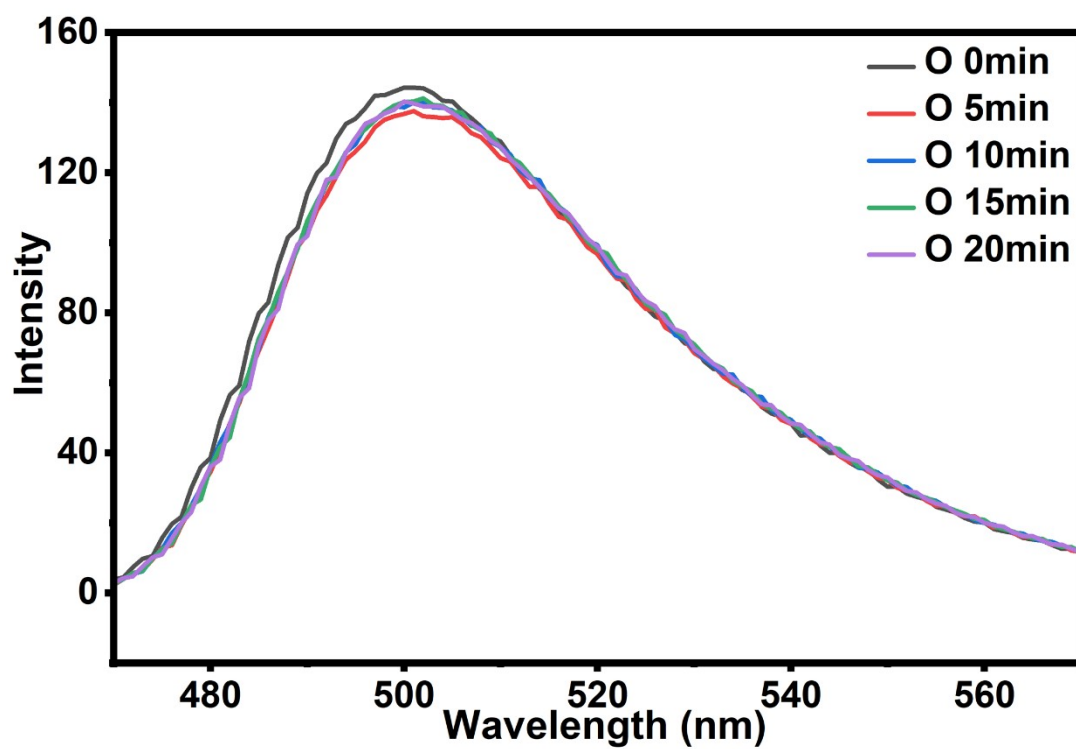

**Fig. S9.** Fluorescence intensity changes upon oxidation of 2-(4-(dimethylamino)benzylidene) malononitrile, generated from malononitrile and 4-(dimethylamino)benzaldehyde, in organic phase (DMSO).
